# Supplementary material for: Structural and spectroscopic study and intermolecular chalcogen bonding interactions in 1,3-dicarbonyl compounds
Source: Royal Society of Chemistry journal article supplement (doi:10.1039/d4nj02508c), 2024-01-01
Supplement: d4nj02508c1.pdf [file d4nj02508c1.pdf]

## Supplementary Material

### Structural and spectroscopic study and intermolecular chalcogen bonding interactions in 1,3-dicarbonyl compounds.

L.E. Salvador Vallejo,<sup>1</sup> J. L. Jios,<sup>2,3\*</sup> S. E. Ulic,<sup>1,4\*</sup> G. A. Echeverría,<sup>5</sup> O. E. Piro,<sup>5</sup> R. Pis Diez,<sup>1</sup> C. Vázquez,<sup>6</sup> C. Merlo<sup>6,7</sup>

<sup>1</sup>CEQUINOR (CONICET-UNLP), Facultad de Ciencias Exactas, Universidad Nacional de La Plata, 47 esq, 115, (1900) La Plata, República Argentina.

<sup>2</sup>Laboratorio UPL (UNLP-CIC), Campus Tecnológico Gonnet (CIC-BA), Cno. Centenario e/505 y 508, (1897) Gonnet, Argentina.

<sup>3</sup>Departamento de Química, Facultad de Ciencias Exactas, Universidad Nacional de La Plata, 47 esq, 115, (1900) La Plata, República Argentina.

<sup>4</sup>Departamento de Ciencias Básicas, Universidad Nacional de Luján, Rutas 5 y 7, (6700) Luján, Buenos Aires, República Argentina.

<sup>5</sup>Departamento de Física, Facultad de Ciencias Exactas, Universidad Nacional de La Plata e IFLP (CONICET, CCT-La Plata), C, C, 67, 1900 La Plata, Argentina.

<sup>6</sup>Departamento de Recursos Naturales, Facultad de Ciencias Agropecuarias, Universidad Nacional de Córdoba, Av. Félix Aldo Marrone N° 746, Ciudad Universitaria, Córdoba, Argentina.

<sup>7</sup>Instituto Multidisciplinario de Biología Vegetal (IMBIV-CONICET), Av. Vélez Sarsfield, 1611, Córdoba, Argentina

\*E-mail: [jjios@quimica.unlp.edu.ar](mailto:jjios@quimica.unlp.edu.ar), [sonia@quimica.unlp.edu.ar](mailto:sonia@quimica.unlp.edu.ar)

**Table S1.** Crystal data and structure refinement results for I.

|                             |                                                                           |
|-----------------------------|---------------------------------------------------------------------------|
| Empirical formula           | C <sub>19</sub> H <sub>13</sub> ClO <sub>3</sub>                          |
| Formula weight              | 324.74                                                                    |
| Temperature                 | 295(2) K                                                                  |
| Wavelength                  | 0.71073 Å                                                                 |
| Crystal system              | Monoclinic                                                                |
| Space group                 | P 2 <sub>1</sub> /c                                                       |
| Unit cell dimensions        | a = 11.213(1) Å<br>b = 7.9744(9) Å<br>c = 17.775(1) Å<br>β = 106.759(9)°. |
| Volume                      | 1521.9(3) Å <sup>3</sup>                                                  |
| Z                           | 4                                                                         |
| Density (calculated)        | 1.417 Mg/m <sup>3</sup>                                                   |
| Absorption coefficient      | 0.263 mm <sup>-1</sup>                                                    |
| F(000)                      | 672                                                                       |
| Crystal size                | 0.708 x 0.306 x 0.200 mm <sup>3</sup>                                     |
| θ-range for data collection | 3.457 to 25.250°                                                          |
| Index ranges                | -13 ≤ h ≤ 13, -7 ≤ k ≤ 9, -21 ≤ l ≤ 14                                    |
| Reflections collected       | 4349                                                                      |
| Independent reflections     | 2505 [R(int) = 0.0275]                                                    |

|                                            |                                    |
|--------------------------------------------|------------------------------------|
| Observed reflections [ $I > 2\sigma(I)$ ]  | 1658                               |
| Completeness to $\vartheta = 25.000^\circ$ | 90.5 %                             |
| Refinement method                          | Full-matrix least-squares on $F^2$ |
| Data / restraints / parameters             | 2505 / 0 / 261                     |
| Goodness-of-fit on $F^2$                   | 1.042                              |
| Final R indices [ $I > 2\sigma(I)$ ]       | R1 = 0.0504, wR2 = 0.1254          |
| R indices (all data)                       | R1 = 0.0807, wR2 = 0.1533          |
| Extinction coefficient                     | 0.015(2)                           |
| Largest diff. peak and hole                | 0.249 and -0.387 e.Å <sup>-3</sup> |

$${}^aR_1 = \frac{\sum ||F_o| - |F_c||}{\sum |F_o|}, \quad wR_2 = \left[ \frac{\sum w(|F_o|^2 - |F_c|^2)^2}{\sum w(|F_o|^2)^2} \right]^{1/2}$$

**Table S2.** Crystal data and structure refinement results for II.

|                                            |                                                                         |
|--------------------------------------------|-------------------------------------------------------------------------|
| Empirical formula                          | C <sub>20</sub> H <sub>15</sub> ClO <sub>3</sub>                        |
| Formula weight                             | 338.77                                                                  |
| Temperature                                | 297(2) K                                                                |
| Wavelength                                 | 1.54184 Å                                                               |
| Crystal system                             | Monoclinic                                                              |
| Space group                                | P 2 <sub>1</sub> /c                                                     |
| Unit cell dimensions                       | a = 3.8968(2) Å<br>b = 13.416(1) Å<br>c = 30.169(2) Å<br>β = 87.761(5)° |
| Volume                                     | 1576.0(2) Å <sup>3</sup>                                                |
| Z                                          | 4                                                                       |
| Density (calculated)                       | 1.428 Mg/m <sup>3</sup>                                                 |
| Absorption coefficient                     | 2.274 mm <sup>-1</sup>                                                  |
| F(000)                                     | 704                                                                     |
| Crystal size                               | 0.493 x 0.197 x 0.033 mm <sup>3</sup>                                   |
| $\vartheta$ -range for data collection     | 3.606 to 72.255°                                                        |
| Index ranges                               | -4 ≤ h ≤ 2, -16 ≤ k ≤ 16, -36 ≤ l ≤ 37                                  |
| Reflections collected                      | 11069                                                                   |
| Independent reflections                    | 3077 [R(int) = 0.0473]                                                  |
| Observed reflections [ $I > 2\sigma(I)$ ]  | 2026                                                                    |
| Completeness to $\vartheta = 67.684^\circ$ | 99.9 %                                                                  |
| Refinement method                          | Full-matrix least-squares on $F^2$                                      |
| Data / restraints / parameters             | 3077 / 0 / 220                                                          |
| Goodness-of-fit on $F^2$                   | 1.056                                                                   |
| Final R indices [ $I > 2\sigma(I)$ ]       | R1 = 0.0584, wR2 = 0.1584                                               |
| R indices (all data)                       | R1 = 0.0888, wR2 = 0.1861                                               |
| Largest diff. peak and hole                | 0.348 and -0.225 e.Å <sup>-3</sup>                                      |

**Table S3.** Bond lengths [Å] and angles [°] in I.

|                |          |                   |          |
|----------------|----------|-------------------|----------|
| Cl-C(5)        | 1.739(3) | C(3)-C(2)-C(1)    | 119.8(3) |
| O(1)-C(2)      | 1.348(4) | C(4)-C(3)-C(2)    | 120.6(3) |
| O(2)-C(7)      | 1.254(3) | C(3)-C(4)-C(5)    | 120.3(3) |
| O(3)-C(9)      | 1.322(3) | C(6)-C(5)-C(4)    | 119.6(3) |
| C(1)-C(6)      | 1.390(4) | C(6)-C(5)-Cl      | 119.6(2) |
| C(1)-C(2)      | 1.408(4) | C(4)-C(5)-Cl      | 120.8(3) |
| C(1)-C(7)      | 1.481(4) | C(5)-C(6)-C(1)    | 121.5(3) |
| C(2)-C(3)      | 1.392(5) | O(2)-C(7)-C(8)    | 119.8(3) |
| C(3)-C(4)      | 1.362(5) | O(2)-C(7)-C(1)    | 119.3(2) |
| C(4)-C(5)      | 1.387(4) | C(8)-C(7)-C(1)    | 120.9(3) |
| C(5)-C(6)      | 1.374(4) | C(9)-C(8)-C(7)    | 122.0(3) |
| C(7)-C(8)      | 1.438(4) | O(3)-C(9)-C(8)    | 122.7(2) |
| C(8)-C(9)      | 1.359(4) | O(3)-C(9)-C(10)   | 115.4(2) |
| C(9)-C(10)     | 1.476(3) | C(8)-C(9)-C(10)   | 121.9(3) |
| C(10)-C(11)    | 1.360(4) | C(11)-C(10)-C(19) | 120.1(3) |
| C(10)-C(19)    | 1.435(4) | C(11)-C(10)-C(9)  | 118.4(3) |
| C(11)-C(12)    | 1.412(5) | C(19)-C(10)-C(9)  | 121.5(2) |
| C(12)-C(13)    | 1.349(6) | C(10)-C(11)-C(12) | 120.8(4) |
| C(13)-C(14)    | 1.400(5) | C(13)-C(12)-C(11) | 120.2(4) |
| C(14)-C(19)    | 1.424(3) | C(12)-C(13)-C(14) | 121.6(3) |
| C(14)-C(15)    | 1.423(5) | C(13)-C(14)-C(19) | 119.1(3) |
| C(15)-C(16)    | 1.348(5) | C(13)-C(14)-C(15) | 122.0(3) |
| C(16)-C(17)    | 1.388(5) | C(19)-C(14)-C(15) | 118.9(3) |
| C(17)-C(18)    | 1.365(4) | C(16)-C(15)-C(14) | 121.8(3) |
| C(18)-C(19)    | 1.406(4) | C(15)-C(16)-C(17) | 119.1(4) |
|                |          | C(18)-C(17)-C(16) | 121.5(4) |
| C(6)-C(1)-C(2) | 118.0(3) | C(17)-C(18)-C(19) | 121.4(3) |
| C(6)-C(1)-C(7) | 121.6(2) | C(18)-C(19)-C(14) | 117.3(3) |
| C(2)-C(1)-C(7) | 120.4(3) | C(18)-C(19)-C(10) | 124.4(2) |
| O(1)-C(2)-C(3) | 116.8(3) | C(14)-C(19)-C(10) | 118.3(3) |
| O(1)-C(2)-C(1) | 123.4(3) |                   |          |

**Table S4.** Bond lengths [Å] and angles[°] in II.

|                |          |                   |          |
|----------------|----------|-------------------|----------|
| Cl-C(5)        | 1.737(3) | C(3)-C(2)-C(1)    | 120.0(3) |
| O(1)-C(2)      | 1.349(4) | C(4)-C(3)-C(2)    | 122.3(3) |
| O(2)-C(7)      | 1.276(3) | C(3)-C(4)-C(5)    | 117.1(3) |
| O(3)-C(9)      | 1.323(3) | C(3)-C(4)-C(20)   | 120.9(3) |
| C(1)-C(6)      | 1.396(4) | C(5)-C(4)-C(20)   | 122.1(3) |
| C(1)-C(2)      | 1.408(4) | C(6)-C(5)-C(4)    | 122.0(3) |
| C(1)-C(7)      | 1.471(4) | C(6)-C(5)Cl       | 118.8(2) |
| C(2)-C(3)      | 1.401(4) | C(4)-C(5)-Cl      | 119.2(2) |
| C(3)-C(4)      | 1.371(5) | C(5)-C(6)-C(1)    | 120.9(3) |
| C(4)-C(5)      | 1.403(4) | O(2)-C(7)-C(8)    | 119.0(3) |
| C(4)-C(20)     | 1.502(4) | O(2)-C(7)-C(1)    | 118.5(2) |
| C(5)-C(6)      | 1.379(4) | C(8)-C(7)-C(1)    | 122.4(2) |
| C(7)-C(8)      | 1.432(4) | C(9)-C(8)-C(7)    | 120.9(3) |
| C(8)-C(9)      | 1.376(4) | O(3)-C(9)-C(8)    | 121.6(3) |
| C(9)-C(10)     | 1.480(4) | O(3)-C(9)-C(10)   | 115.2(2) |
| C(10)-C(11)    | 1.368(4) | C(8)-C(9)-C(10)   | 123.2(2) |
| C(10)-C(19)    | 1.438(4) | C(11)-C(10)-C(19) | 120.2(3) |
| C(11)-C(12)    | 1.404(4) | C(11)-C(10)-C(9)  | 118.8(3) |
| C(12)-C(13)    | 1.360(5) | C(19)-C(10)-C(9)  | 121.0(2) |
| C(13)-C(14)    | 1.414(4) | C(10)-C(11)-C(12) | 121.3(3) |
| C(14)-C(15)    | 1.428(4) | C(13)-C(12)-C(11) | 120.3(3) |
| C(14)-C(19)    | 1.426(4) | C(12)-C(13)-C(14) | 120.6(3) |
| C(15)-C(16)    | 1.343(5) | C(15)-C(14)-C(13) | 121.3(3) |
| C(16)-C(17)    | 1.409(5) | C(15)-C(14)-C(19) | 118.7(3) |
| C(17)-C(18)    | 1.366(4) | C(13)-C(14)-C(19) | 120.1(3) |
| C(18)-C(19)    | 1.416(4) | C(16)-C(15)-C(14) | 121.4(3) |
| C(6)-C(1)-C(2) | 117.7(3) | C(18)-C(17)-C(16) | 120.7(3) |
| C(6)-C(1)-C(7) | 122.2(2) | C(17)-C(18)-C(19) | 120.9(3) |
| C(2)-C(1)-C(7) | 120.1(3) | C(14)-C(19)-C(18) | 118.2(3) |
| O(1)-C(2)-C(3) | 116.9(3) | C(14)-C(19)-C(10) | 117.5(3) |
| O(1)-C(2)-C(1) | 123.0(3) | C(18)-C(19)-C(10) | 124.2(3) |

**Table S5.** Atomic coordinates ( $\times 10^4$ ) and equivalent isotropic displacement parameters ( $\text{\AA}^2 \times 10^3$ ) for I. U(eq) is defined as one third of the trace of the orthogonalized  $U_{ij}$  tensor.

| Atom  | x       | y        | z       | U(eq) |
|-------|---------|----------|---------|-------|
| Cl    | 1959(1) | 1078(1)  | 5035(1) | 96(1) |
| O(1)  | 5056(2) | 6778(4)  | 6500(1) | 94(1) |
| O(2)  | 4537(2) | 8145(3)  | 5123(1) | 74(1) |
| O(3)  | 3951(2) | 9640(3)  | 3798(1) | 72(1) |
| C(1)  | 3677(2) | 5533(4)  | 5322(1) | 55(1) |
| C(2)  | 4311(3) | 5520(5)  | 6131(2) | 69(1) |
| C(3)  | 4198(3) | 4145(6)  | 6588(2) | 77(1) |
| C(4)  | 3485(3) | 2804(6)  | 6260(2) | 74(1) |
| C(5)  | 2861(3) | 2790(4)  | 5463(2) | 65(1) |
| C(6)  | 2954(3) | 4147(4)  | 5007(2) | 58(1) |
| C(7)  | 3788(2) | 6989(4)  | 4829(2) | 54(1) |
| C(8)  | 3053(2) | 7089(4)  | 4021(2) | 55(1) |
| C(9)  | 3160(2) | 8390(4)  | 3551(1) | 52(1) |
| C(10) | 2404(2) | 8490(4)  | 2722(1) | 53(1) |
| C(11) | 2312(3) | 7099(5)  | 2265(2) | 71(1) |
| C(12) | 1574(4) | 7110(6)  | 1474(2) | 93(1) |
| C(13) | 943(4)  | 8505(6)  | 1161(2) | 85(1) |
| C(14) | 998(3)  | 9971(5)  | 1603(1) | 62(1) |
| C(15) | 312(3)  | 11435(6) | 1284(2) | 77(1) |
| C(16) | 351(3)  | 12834(6) | 1716(2) | 80(1) |
| C(17) | 1074(3) | 12843(5) | 2495(2) | 71(1) |
| C(18) | 1754(3) | 11474(4) | 2829(2) | 58(1) |
| C(19) | 1750(2) | 9992(4)  | 2400(1) | 50(1) |

**Table S6.** Atomic coordinates ( $\times 10^4$ ) and equivalent isotropic displacement parameters ( $\text{\AA}^2 \times 10^3$ ) for II.

| Atom  | x        | y        | z       | U(eq) |
|-------|----------|----------|---------|-------|
| Cl    | 1945(3)  | 9259(1)  | -483(1) | 88(1) |
| O(1)  | 3434(8)  | 5556(2)  | 510(1)  | 79(1) |
| O(2)  | 6285(7)  | 6549(2)  | 1113(1) | 63(1) |
| O(3)  | 8370(7)  | 7439(2)  | 1770(1) | 60(1) |
| C(1)  | 4089(7)  | 7352(2)  | 487(1)  | 45(1) |
| C(2)  | 3127(8)  | 6437(2)  | 300(1)  | 54(1) |
| C(3)  | 1729(8)  | 6415(3)  | -121(1) | 59(1) |
| C(4)  | 1354(8)  | 7259(3)  | -371(1) | 56(1) |
| C(5)  | 2330(8)  | 8165(2)  | -181(1) | 54(1) |
| C(6)  | 3673(8)  | 8213(2)  | 235(1)  | 49(1) |
| C(7)  | 5583(7)  | 7375(2)  | 927(1)  | 46(1) |
| C(8)  | 6204(7)  | 8286(2)  | 1157(1) | 44(1) |
| C(9)  | 7503(7)  | 8279(2)  | 1575(1) | 44(1) |
| C(10) | 8082(7)  | 9195(2)  | 1835(1) | 44(1) |
| C(11) | 9595(7)  | 9997(2)  | 1626(1) | 50(1) |
| C(12) | 10354(8) | 10869(2) | 1859(1) | 57(1) |
| C(13) | 9561(8)  | 10938(2) | 2301(1) | 56(1) |
| C(14) | 7920(7)  | 10139(2) | 2530(1) | 48(1) |
| C(15) | 7014(8)  | 10206(3) | 2992(1) | 58(1) |
| C(16) | 5405(9)  | 9455(3)  | 3209(1) | 64(1) |
| C(17) | 4594(8)  | 8574(3)  | 2981(1) | 59(1) |
| C(18) | 5405(7)  | 8475(2)  | 2539(1) | 50(1) |
| C(19) | 7145(6)  | 9243(2)  | 2300(1) | 44(1) |
| C(20) | -79(10)  | 7205(3)  | -825(1) | 77(1) |

**Table S7.** Anisotropic displacement parameters ( $\text{\AA}^2 \times 10^3$ ) for I. The anisotropic displacement factor exponent takes the form:  $-2\pi^2[h^2a^2U^{11} + \dots + 2hkab^*U^{12}]$ .

| Atom  | U11    | U22    | U33   | U23    | U13   | U12    |
|-------|--------|--------|-------|--------|-------|--------|
| Cl    | 151(1) | 62(1)  | 88(1) | 9(1)   | 55(1) | -10(1) |
| O(1)  | 82(2)  | 121(3) | 65(1) | 12(2)  | 1(1)  | -21(2) |
| O(2)  | 66(1)  | 69(2)  | 72(1) | 4(1)   | -2(1) | -8(1)  |
| O(3)  | 67(1)  | 61(2)  | 74(1) | 9(1)   | 0(1)  | -16(1) |
| C(1)  | 48(1)  | 62(2)  | 56(2) | 6(1)   | 16(1) | 14(1)  |
| C(2)  | 48(2)  | 94(3)  | 62(2) | 9(2)   | 12(1) | 11(2)  |
| C(3)  | 57(2)  | 111(3) | 61(2) | 21(2)  | 16(2) | 7(2)   |
| C(4)  | 65(2)  | 89(3)  | 78(2) | 33(2)  | 35(2) | 19(2)  |
| C(5)  | 72(2)  | 63(2)  | 68(2) | 13(2)  | 34(1) | 15(2)  |
| C(6)  | 68(2)  | 54(2)  | 57(2) | 7(1)   | 24(1) | 13(2)  |
| C(7)  | 47(1)  | 51(2)  | 63(2) | 1(1)   | 13(1) | 5(1)   |
| C(8)  | 50(1)  | 53(2)  | 58(2) | -2(1)  | 12(1) | -3(1)  |
| C(9)  | 51(1)  | 45(2)  | 58(1) | -1(1)  | 14(1) | -1(1)  |
| C(10) | 61(2)  | 51(2)  | 52(1) | -7(1)  | 24(1) | -9(1)  |
| C(11) | 97(2)  | 56(2)  | 67(2) | -10(2) | 34(2) | -12(2) |
| C(12) | 142(3) | 77(3)  | 70(2) | -32(2) | 48(2) | -34(3) |
| C(13) | 105(3) | 105(4) | 45(2) | -8(2)  | 20(2) | -27(2) |
| C(14) | 63(2)  | 85(3)  | 41(1) | 2(2)   | 19(1) | -21(2) |
| C(15) | 59(2)  | 118(4) | 51(2) | 28(2)  | 12(2) | -7(2)  |
| C(16) | 66(2)  | 97(4)  | 81(2) | 27(2)  | 27(2) | 11(2)  |
| C(17) | 71(2)  | 70(3)  | 75(2) | 9(2)   | 27(2) | 10(2)  |
| C(18) | 63(2)  | 60(2)  | 51(2) | -1(1)  | 18(1) | -1(2)  |
| C(19) | 49(1)  | 60(2)  | 44(1) | 2(1)   | 19(1) | -9(1)  |

**Table S8.** Anisotropic displacement parameters ( $\text{\AA}^2 \times 10^3$ ) for II.

| Atom  | U11    | U22    | U33   | U23    | U13    | U12    |
|-------|--------|--------|-------|--------|--------|--------|
| Cl    | 125(1) | 80(1)  | 62(1) | 20(1)  | -40(1) | -19(1) |
| O(1)  | 127(2) | 48(1)  | 63(2) | -5(1)  | -17(2) | -9(1)  |
| O(2)  | 97(2)  | 46(1)  | 45(1) | -1(1)  | -10(1) | 6(1)   |
| O(3)  | 89(2)  | 49(1)  | 44(1) | 0(1)   | -17(1) | 13(1)  |
| C(1)  | 51(1)  | 46(2)  | 38(1) | -5(1)  | 2(1)   | -2(1)  |
| C(2)  | 66(2)  | 49(2)  | 46(2) | -6(1)  | 2(1)   | -4(1)  |
| C(3)  | 66(2)  | 61(2)  | 48(2) | -18(1) | 1(1)   | -12(2) |
| C(4)  | 53(2)  | 74(2)  | 40(2) | -11(1) | 0(1)   | -10(1) |
| C(5)  | 57(2)  | 64(2)  | 40(2) | 3(1)   | -7(1)  | -8(1)  |
| C(6)  | 59(2)  | 49(2)  | 40(2) | -4(1)  | -7(1)  | -8(1)  |
| C(7)  | 54(2)  | 46(2)  | 38(1) | -2(1)  | 2(1)   | 1(1)   |
| C(8)  | 54(2)  | 45(2)  | 35(1) | 0(1)   | -6(1)  | 4(1)   |
| C(9)  | 49(1)  | 46(2)  | 38(1) | -1(1)  | -2(1)  | 5(1)   |
| C(10) | 44(1)  | 47(2)  | 40(2) | -3(1)  | -12(1) | 4(1)   |
| C(11) | 54(2)  | 56(2)  | 41(2) | 3(1)   | -9(1)  | 3(1)   |
| C(12) | 58(2)  | 50(2)  | 63(2) | 8(1)   | -13(2) | -5(1)  |
| C(13) | 58(2)  | 50(2)  | 59(2) | -7(1)  | -15(1) | 2(1)   |
| C(14) | 44(1)  | 52(2)  | 49(2) | -7(1)  | -12(1) | 5(1)   |
| C(15) | 60(2)  | 66(2)  | 50(2) | -20(2) | -12(1) | 5(2)   |
| C(16) | 66(2)  | 85(2)  | 40(2) | -9(2)  | 0(1)   | 2(2)   |
| C(17) | 60(2)  | 72(2)  | 45(2) | 3(1)   | 0(1)   | -2(2)  |
| C(18) | 50(2)  | 55(2)  | 47(2) | -3(1)  | -6(1)  | 0(1)   |
| C(19) | 40(1)  | 51(2)  | 41(2) | -3(1)  | -9(1)  | 6(1)   |
| C(20) | 78(2)  | 110(3) | 44(2) | -16(2) | -13(2) | -15(2) |



**Table S9.** Hydrogen coordinates ( $\times 10^4$ ) and isotropic displacement parameters ( $\text{\AA}^2 \times 10^3$ ) for I.

| Atom  | x        | y         | z        | U(eq)   |
|-------|----------|-----------|----------|---------|
| H(O1) | 5080(40) | 7500(60)  | 6150(20) | 117(16) |
| H(O3) | 4390(30) | 9460(60)  | 4350(20) | 133(15) |
| H(3)  | 4660(30) | 4340(50)  | 7144(19) | 91(10)  |
| H(4)  | 3380(30) | 1940(50)  | 6550(20) | 100(12) |
| H(6)  | 2490(20) | 4120(40)  | 4483(16) | 65(8)   |
| H(8)  | 2430(20) | 6160(30)  | 3787(13) | 50(6)   |
| H(11) | 2760(20) | 6130(40)  | 2499(15) | 60(8)   |
| H(12) | 1620(30) | 6090(50)  | 1245(18) | 86(11)  |
| H(13) | 370(30)  | 8500(50)  | 622(19)  | 90(10)  |
| H(15) | -160(30) | 11360(50) | 800(20)  | 98(12)  |
| H(16) | -150(40) | 13900(60) | 1460(20) | 117(13) |
| H(17) | 1150(30) | 13880(50) | 2820(20) | 92(11)  |
| H(18) | 2190(20) | 11530(40) | 3357(17) | 77(9)   |

**Table S10.** Hydrogen coordinates ( $\times 10^4$ ) and isotropic displacement parameters ( $\text{\AA}^2 \times 10^3$ ) for II.

| Atom   | x     | y     | z     | U(eq) |
|--------|-------|-------|-------|-------|
| H(1)   | 4422  | 5641  | 742   | 119   |
| H(3)   | 7867  | 6965  | 1614  | 90    |
| H(3A)  | 1032  | 5807  | -235  | 70    |
| H(6)   | 4311  | 8827  | 348   | 59    |
| H(8)   | 5722  | 8892  | 1023  | 53    |
| H(11)  | 10130 | 9963  | 1323  | 60    |
| H(12)  | 11405 | 11403 | 1711  | 68    |
| H(13)  | 10102 | 11515 | 2454  | 67    |
| H(15)  | 7549  | 10782 | 3146  | 70    |
| H(16)  | 4826  | 9517  | 3510  | 77    |
| H(17)  | 3494  | 8055  | 3134  | 71    |
| H(18)  | 4806  | 7894  | 2392  | 60    |
| H(20A) | 1652  | 7404  | -1043 | 116   |
| H(20B) | -2020 | 7643  | -840  | 116   |
| H(20C) | -786  | 6534  | -884  | 116   |

**Table S11.** Torsion angles [°] for I.

|                       |           |                         |           |
|-----------------------|-----------|-------------------------|-----------|
| C(6)-C(1)-C(2)-O(1)   | 178.9(3)  | O(3)-C(9)-C(10)-C(19)   | -49.1(3)  |
| C(7)-C(1)-C(2)-O(1)   | -1.1(4)   | C(8)-C(9)-C(10)-C(19)   | 131.6(3)  |
| C(6)-C(1)-C(2)-C(3)   | -0.1(4)   | C(19)-C(10)-C(11)-C(12) | -0.2(4)   |
| C(7)-C(1)-C(2)-C(3)   | 179.9(3)  | C(9)-C(10)-C(11)-C(12)  | 178.2(3)  |
| O(1)-C(2)-C(3)-C(4)   | -178.6(3) | C(10)-C(11)-C(12)-C(13) | -0.3(5)   |
| C(1)-C(2)-C(3)-C(4)   | 0.4(5)    | C(11)-C(12)-C(13)-C(14) | 0.0(6)    |
| C(2)-C(3)-C(4)-C(5)   | 0.0(5)    | C(12)-C(13)-C(14)-C(19) | 0.7(5)    |
| C(3)-C(4)-C(5)-C(6)   | -0.8(4)   | C(12)-C(13)-C(14)-C(15) | -178.4(3) |
| C(3)-C(4)-C(5)-Cl     | 179.4(3)  | C(13)-C(14)-C(15)-C(16) | 178.8(3)  |
| C(4)-C(5)-C(6)-C(1)   | 1.1(4)    | C(19)-C(14)-C(15)-C(16) | -0.3(4)   |
| Cl-C(5)-C(6)-C(1)     | -179.1(2) | C(14)-C(15)-C(16)-C(17) | -0.4(5)   |
| C(2)-C(1)-C(6)-C(5)   | -0.6(4)   | C(15)-C(16)-C(17)-C(18) | 0.7(5)    |
| C(7)-C(1)-C(6)-C(5)   | 179.4(2)  | C(16)-C(17)-C(18)-C(19) | -0.2(5)   |
| C(6)-C(1)-C(7)-O(2)   | -173.7(2) | C(17)-C(18)-C(19)-C(14) | -0.6(4)   |
| C(2)-C(1)-C(7)-O(2)   | 6.3(4)    | C(17)-C(18)-C(19)-C(10) | -177.6(3) |
| C(6)-C(1)-C(7)-C(8)   | 6.1(4)    | C(13)-C(14)-C(19)-C(18) | -178.4(3) |
| C(2)-C(1)-C(7)-C(8)   | -173.9(2) | C(15)-C(14)-C(19)-C(18) | 0.8(3)    |
| O(2)-C(7)-C(8)-C(9)   | 1.5(4)    | C(13)-C(14)-C(19)-C(10) | -1.1(4)   |
| C(1)-C(7)-C(8)-C(9)   | -178.3(3) | C(15)-C(14)-C(19)-C(10) | 178.0(2)  |
| C(7)-C(8)-C(9)-O(3)   | 0.8(4)    | C(11)-C(10)-C(19)-C(18) | 178.0(3)  |
| C(7)-C(8)-C(9)-C(10)  | -180.0(2) | C(9)-C(10)-C(19)-C(18)  | -0.4(4)   |
| O(3)-C(9)-C(10)-C(11) | 132.4(3)  | C(11)-C(10)-C(19)-C(14) | 0.9(4)    |
| C(8)-C(9)-C(10)-C(11) | -46.8(4)  | C(9)-C(10)-C(19)-C(14)  | -177.5(2) |

**Table S12.** Torsion bond angles [°] for II.

|                       |           |                         |           |
|-----------------------|-----------|-------------------------|-----------|
| C(6)-C(1)-C(2)-O(1)   | 179.5(3)  | C(8)-C(9)-C(10)-C(11)   | -44.4(4)  |
| C(7)-C(1)-C(2)-O(1)   | 1.5(5)    | O(3)-C(9)-C(10)-C(19)   | -44.1(4)  |
| C(6)-C(1)-C(2)-C(3)   | -1.5(4)   | C(8)-C(9)-C(10)-C(19)   | 136.8(3)  |
| C(7)-C(1)-C(2)-C(3)   | -179.5(3) | C(19)-C(10)-C(11)-C(12) | 1.8(4)    |
| O(1)-C(2)-C(3)-C(4)   | -178.7(3) | C(9)-C(10)-C(11)-C(12)  | -177.0(3) |
| C(1)-C(2)-C(3)-C(4)   | 2.3(5)    | C(10)-C(11)-C(12)-C(13) | -0.7(4)   |
| C(2)-C(3)-C(4)-C(5)   | -2.1(5)   | C(11)-C(12)-C(13)-C(14) | -0.9(4)   |
| C(2)-C(3)-C(4)-C(20)  | 178.6(3)  | C(12)-C(13)-C(14)-C(15) | -178.8(3) |
| C(3)-C(4)-C(5)-C(6)   | 1.3(5)    | C(12)-C(13)-C(14)-C(19) | 1.3(4)    |
| C(20)-C(4)-C(5)-C(6)  | -179.4(3) | C(13)-C(14)-C(15)-C(16) | 178.9(3)  |
| C(3)-C(4)-C(5)-Cl     | 179.5(2)  | C(19)-C(14)-C(15)-C(16) | -1.3(4)   |
| C(20)-C(4)-C(5)-Cl    | -1.2(5)   | C(14)-C(15)-C(16)-C(17) | 0.4(5)    |
| C(4)-C(5)-C(6)-C(1)   | -0.6(5)   | C(15)-C(16)-C(17)-C(18) | -0.4(5)   |
| Cl-C(5)-C(6)-C(1)     | -178.9(2) | C(16)-C(17)-C(18)-C(19) | 1.4(5)    |
| C(2)-C(1)-C(6)-C(5)   | 0.7(4)    | C(15)-C(14)-C(19)-C(18) | 2.1(4)    |
| C(7)-C(1)-C(6)-C(5)   | 178.7(3)  | C(13)-C(14)-C(19)-C(18) | -178.1(2) |
| C(6)-C(1)-C(7)-O(2)   | -171.2(3) | C(15)-C(14)-C(19)-C(10) | 179.9(2)  |
| C(2)-C(1)-C(7)-O(2)   | 6.7(4)    | C(13)-C(14)-C(19)-C(10) | -0.2(4)   |
| C(6)-C(1)-C(7)-C(8)   | 10.2(4)   | C(17)-C(18)-C(19)-C(14) | -2.2(4)   |
| C(2)-C(1)-C(7)-C(8)   | -171.9(3) | C(17)-C(18)-C(19)-C(10) | -179.9(3) |
| O(2)-C(7)-C(8)-C(9)   | -0.7(4)   | C(11)-C(10)-C(19)-C(14) | -1.3(4)   |
| C(1)-C(7)-C(8)-C(9)   | 177.9(3)  | C(9)-C(10)-C(19)-C(14)  | 177.4(2)  |
| C(7)-C(8)-C(9)-O(3)   | 3.1(4)    | C(11)-C(10)-C(19)-C(18) | 176.4(3)  |
| C(7)-C(8)-C(9)-C(10)  | -177.8(3) | C(9)-C(10)-C(19)-C(18)  | -4.9(4)   |
| O(3)-C(9)-C(10)-C(11) | 134.7(3)  |                         |           |

**Table S13.** Intra and intermolecular hydrogen bond distances and angles in I.

| D-H...A                         | d(D-H)  | d(H...A) | d(D...A) | ∠(DHA) |
|---------------------------------|---------|----------|----------|--------|
| O(1)-H(1) ...O(2)               | 0.86(5) | 1.82(4)  | 2.588(3) | 148(4) |
| O(1)-H(1) ...O(3 <sup>i</sup> ) | 0.86(5) | 2.51(5)  | 3.165(4) | 133(4) |
| O(3)-H(3) ...O(2)               | 0.98(4) | 1.70(4)  | 2.551(3) | 144(4) |
| O(3)-H(3) ...O(2 <sup>i</sup> ) | 0.98(4) | 2.31(4)  | 2.793(3) | 110(4) |

Symmetry transformations used to generate equivalent atoms: (i) -x+1, -y+2, -z+1.

**Table S14.** Intra and intermolecular hydrogen bond distances and angles in II.

| D-H...A           | d(D-H) | d(H...A) | d(D...A) | ∠(DHA) |
|-------------------|--------|----------|----------|--------|
| O(1)-H(1) ...O(2) | 0.82   | 1.82     | 2.544(3) | 146    |
| O(3)-H(3) ...O(2) | 0.82   | 1.75     | 2.479(3) | 148    |

**Table S15:** Experimental and calculated<sup>a</sup> <sup>1</sup>H NMR chemical shifts (in ppm) of **I** and **II**.

|                                          | <b>I</b>    |       | <b>II</b>   |       |
|------------------------------------------|-------------|-------|-------------|-------|
|                                          | Exp.        | Calc. | Exp.        | Calc. |
| HO-enol                                  | 15.57       | 15.30 | 15.54       | 15.26 |
| HO-phenol                                | 12.10       | 12.90 | 11.99       | 12.85 |
| HO-phenol (diketo) <sup>b</sup>          | 11.86       | 12.61 | 11.80       | 12.56 |
| H3                                       | 6.98        | 7.21  | 6.91        | 7.16  |
| H6                                       | 7.64        | 7.94  | 7.63        | 7.86  |
| H4                                       | 7.41        | 7.65  | -           | -     |
| H2'                                      | 7.8         | 8.12  | 7.80        | 8.08  |
| H3'                                      | 7.63 – 7.53 | 8.57  | 7.62 – 7.55 | 7.89  |
| H4'                                      | 8.01        | 8.57  | 8.01        | 8.56  |
| H5'                                      | 7.93        | 8.40  | 7.93        | 8.41  |
| H6'                                      | 7.63 – 7.53 | 7.98  | 7.62 – 7.55 | 7.98  |
| H7'                                      | 7.63 – 7.53 | 8.02  | 7.62 – 7.55 | 8.02  |
| H8'                                      | 8.43        | 9.01  | 8.43        | 9.02  |
| HC <sub>methine</sub>                    | 6.61        | 6.80  | 6.59        | 6.74  |
| CH <sub>2</sub><br>(diketo) <sup>c</sup> | 4.73        | 4.73  | 4.72        | 4.70  |
| CH <sub>3</sub>                          | -           | -     | 2.38        | 2.40  |

<sup>a</sup> Isotropic shielding calculated by the GIAO method using the corresponding TMS shielding, determined at the same level of theory (B3LYP/6-311++g (d,p) from the optimized geometries)

<sup>b</sup> Integrates for approximately 0.05 H

<sup>c</sup> Integrates for approximately 0.1 H

**Table S16:** Experimental and calculated<sup>a</sup> <sup>13</sup>C NMR chemical shifts (in ppm) of I and II.

|                             | I     |        | II     |        |
|-----------------------------|-------|--------|--------|--------|
|                             | Exp.  | Calc.  | Exp.   | Calc.  |
| C=O                         | 194.5 | 201.59 | 194.5  | 201.23 |
| HO-C <sub>enol</sub>        | 181.8 | 192.29 | 181.2  | 191.79 |
| C1                          | 119.6 | 125.63 | 117.9  | 123.94 |
| C2                          | 161.2 | 171.95 | 161.4  | 171.66 |
| C3                          | 120.5 | 126.78 | 120.3  | 127.05 |
| C4                          | 135.8 | 143.93 | 145.2  | 155.99 |
| C5                          | 124   | 139.63 | 124.8  | 140    |
| C6                          | 128.8 | 135.04 | 128.8  | 135.31 |
| C1'                         | 132.5 | 140.97 | 132.7  | 141.07 |
| C2'                         | 127.6 | 133.37 | 127.6  | 136    |
| C3'                         | 125   | 131.07 | 125.1  | 130.88 |
| C4'                         | 132.2 | 140.80 | 132.1  | 140.68 |
| C4'a                        | 133.9 | 143.26 | 134    | 143.50 |
| C5'                         | 127.9 | 136.62 | 128.4  | 136.60 |
| C6'                         | 126.7 | 133.32 | 126.7  | 133.37 |
| C7'                         | 127.6 | 136    | 134.61 | 127.6  |
| C8'                         | 125.4 | 133.47 | 125.5  | 133.54 |
| C8'a                        | 130.2 | 138.89 | 130.3  | 138.97 |
| C <sub>methine</sub>        | 97.7  | 101.84 | 97.6   | 101.67 |
| CH <sub>2</sub><br>(diketo) | 52.5  | 59.26  | -      | 59.28  |
| CH <sub>3</sub>             | -     | -      | 20.9   | 24.17  |

<sup>a</sup> Isotropic shielding calculated by the GIAO method using the corresponding TMS shielding, determined at the same level of theory (B3LYP/6-311++g (d,p) from the optimized geometries)

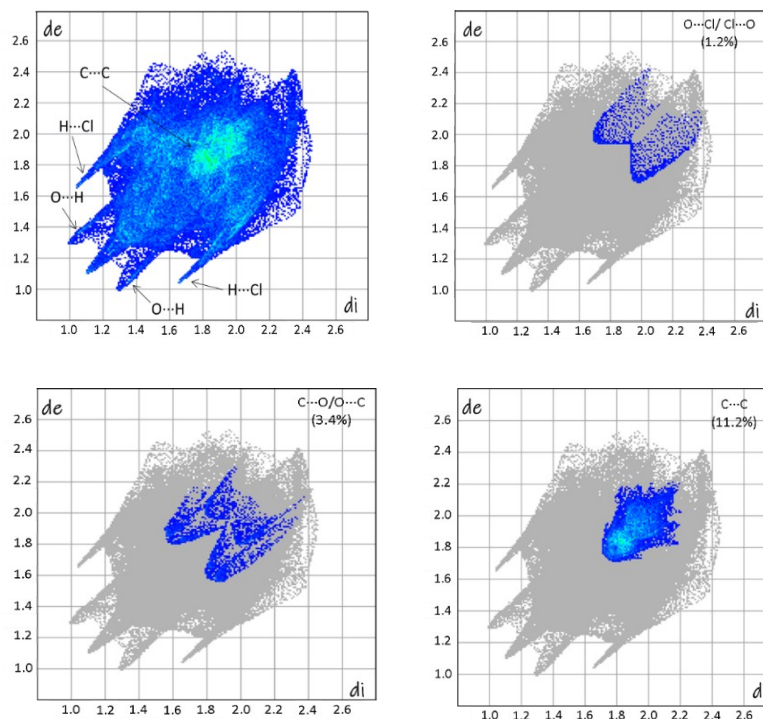

**Figure S1.** 2D decomposition plot of the contacts different from  $X\cdots H$  ( $X = H, O, C$  and  $Cl$ ) surface of **I**.

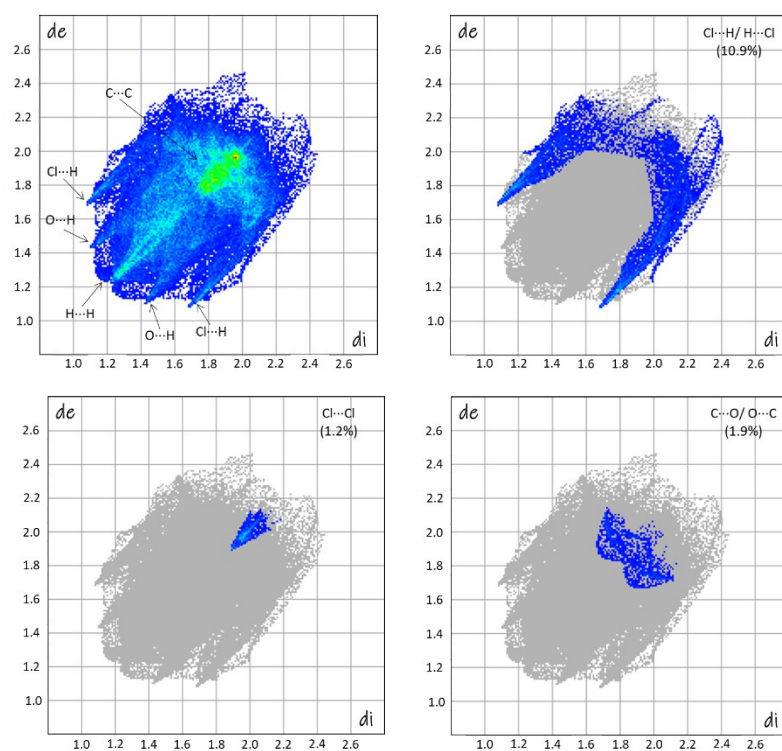

**Figure S2.** 2D decomposition plot of the  $Cl-H$ ,  $C-O$  and  $Cl-Cl$  contacts surface of **II**.

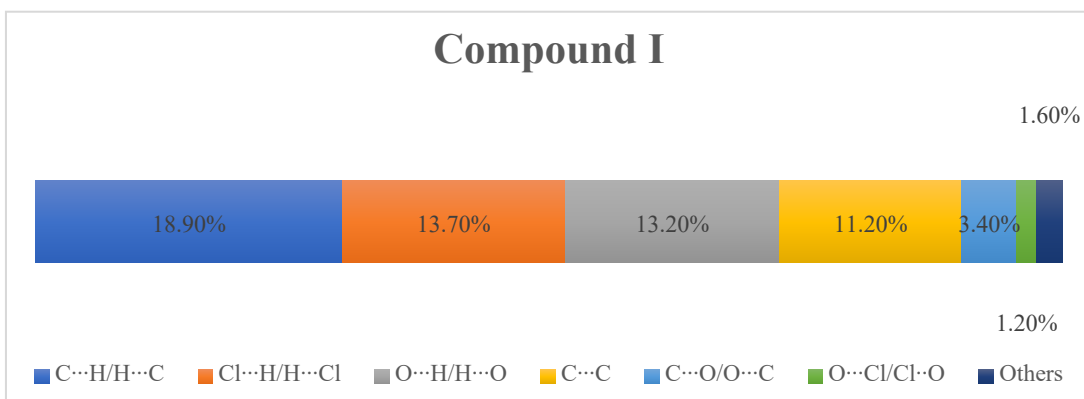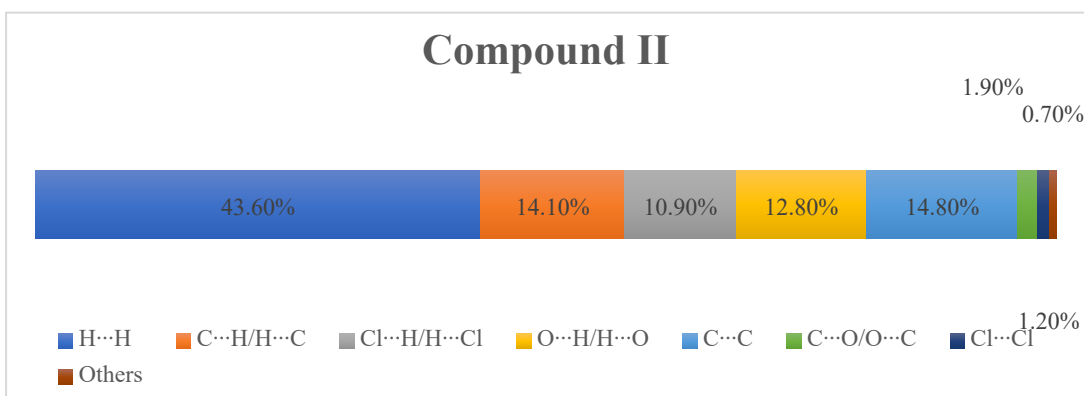

**Figure S3.** Percentual distribution of the intermolecular interactions of the Hirshfeld surface for I and II.

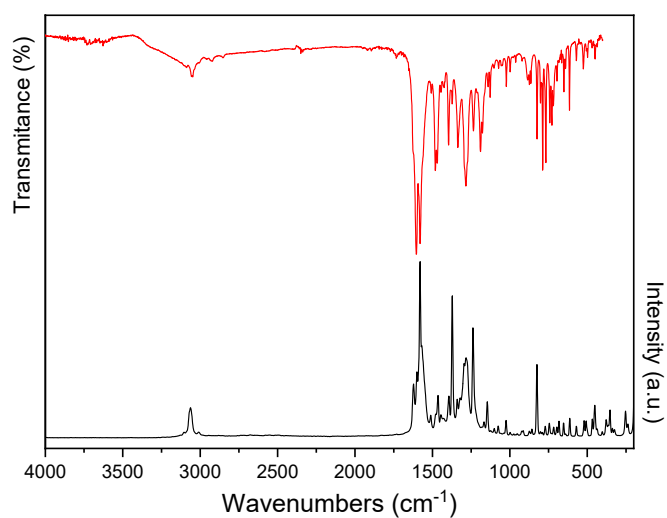

**Figure S4.** Infrared spectrum (upper trace, KBr pellets) and Raman spectrum (solid, lower trace) of I.

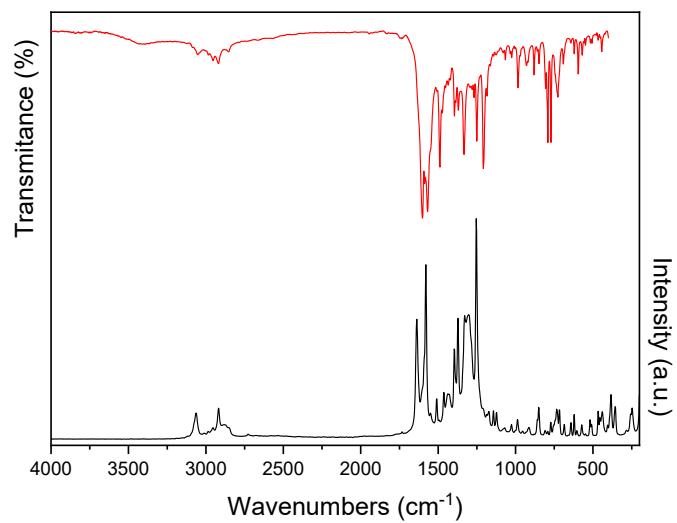

**Figure S5.** Infrared spectrum (upper trace, KBr pellets) and Raman spectrum (solid, lower trace) of II.



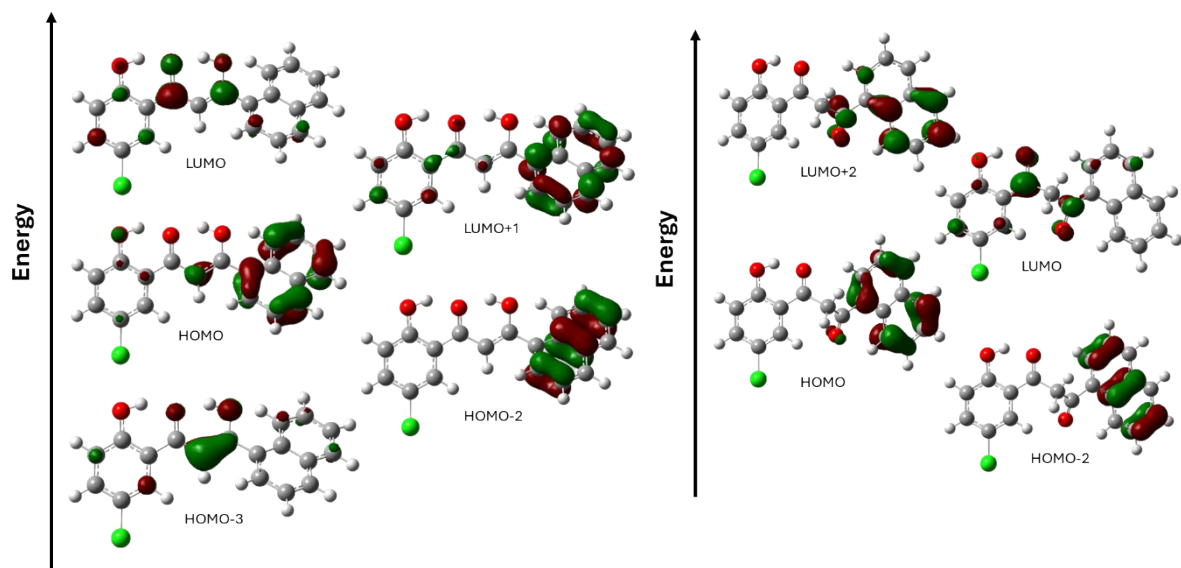

**Figure S6.** Electronic transitions (solvent:  $\text{CH}_3\text{CN}$ ) of **I**, to the left transitions from the keto-enol tautomer and to the right from diketo tautomer.

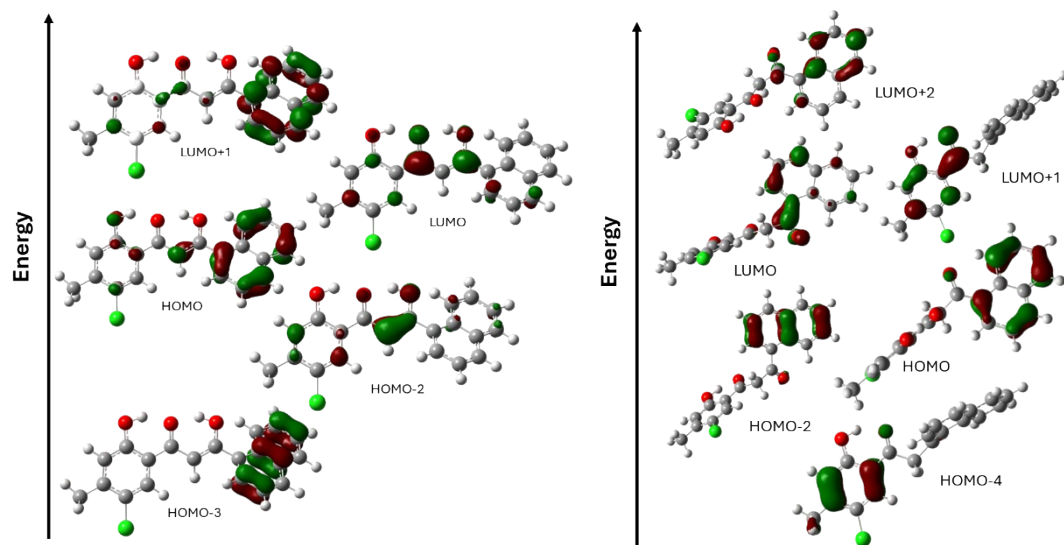

**Figure S7.** Electronic transitions (solvent:  $\text{CH}_3\text{CN}$ ) of **II**, to the left transitions from the Keto-enol tautomer and to the right from diketo tautomer.

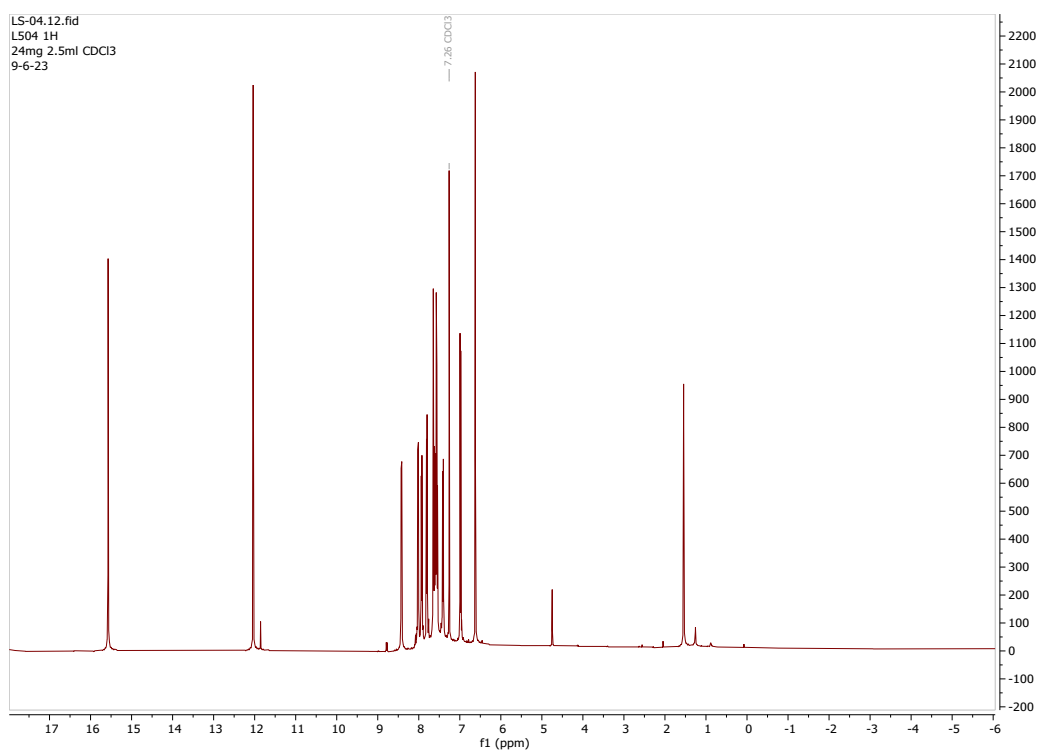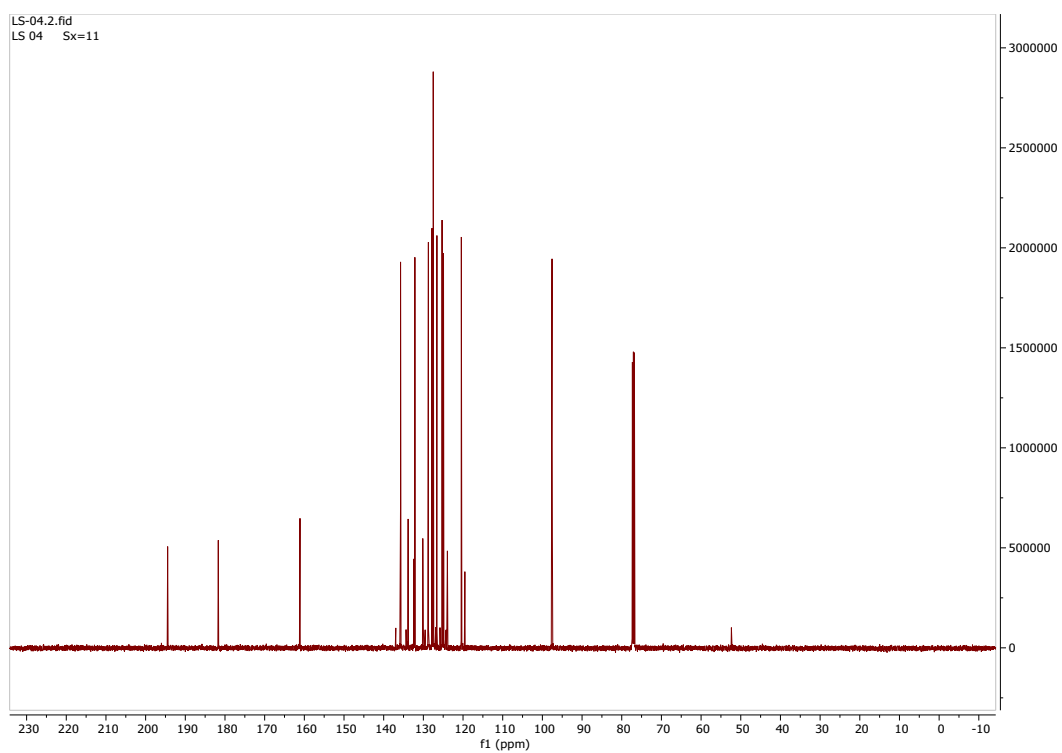

**Figure S8.**  $^1\text{H}$  and  $^{13}\text{C}$  NMR spectra of I.

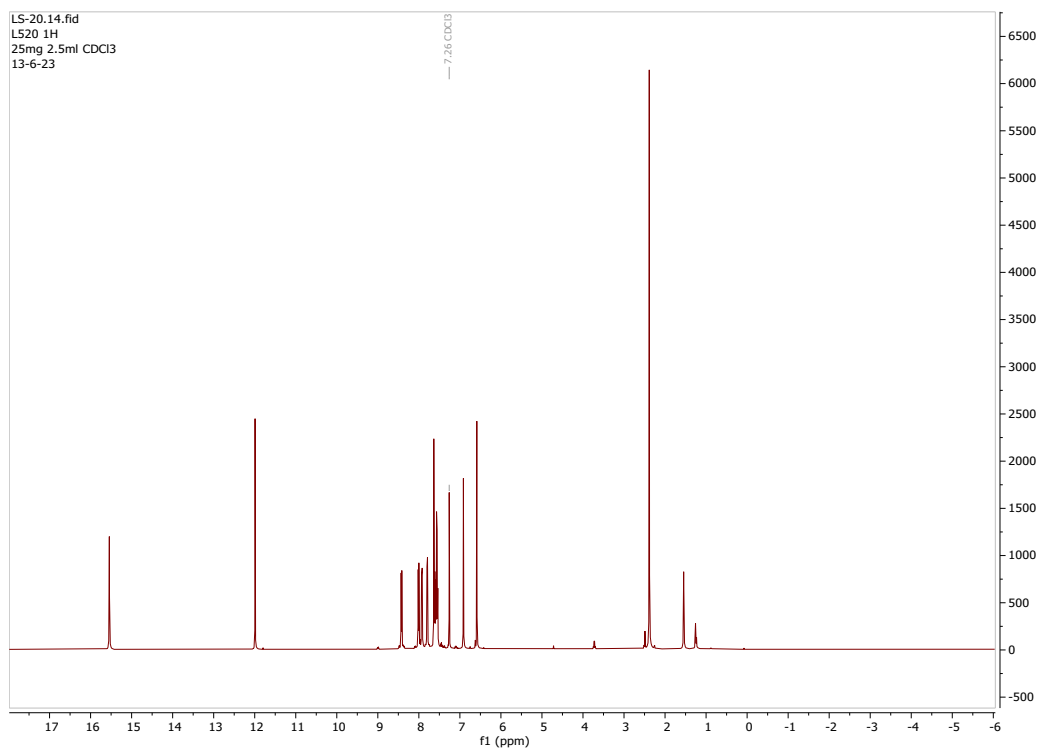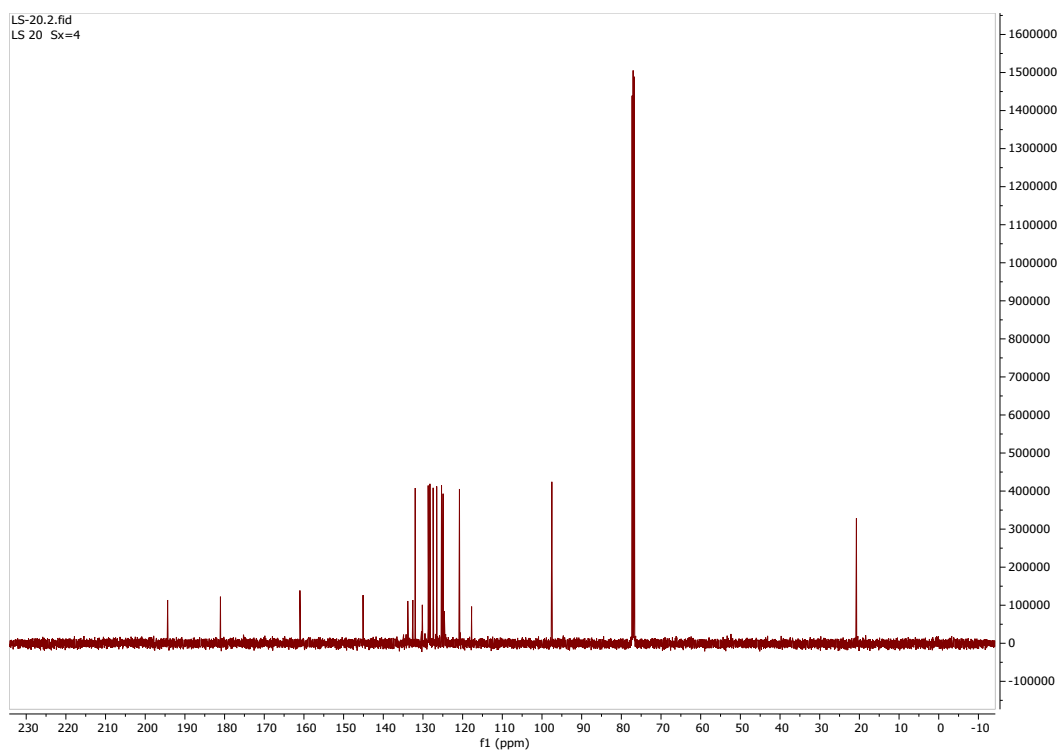

**Figure S9.**  $^1\text{H}$  and  $^{13}\text{C}$  NMR spectra of **II**.

**Compound I**

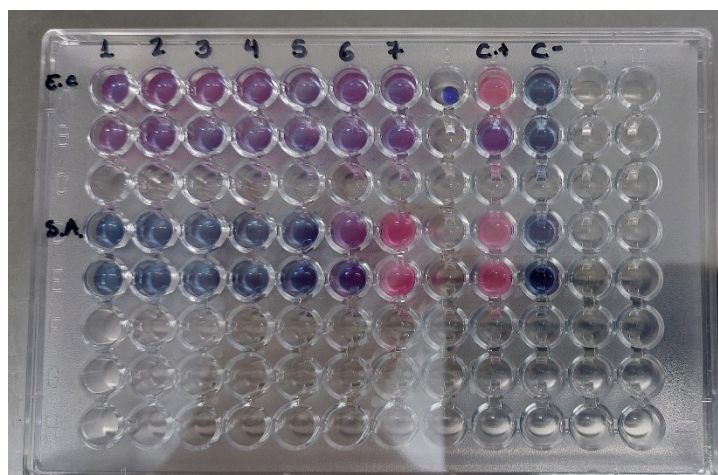

**Compound II**

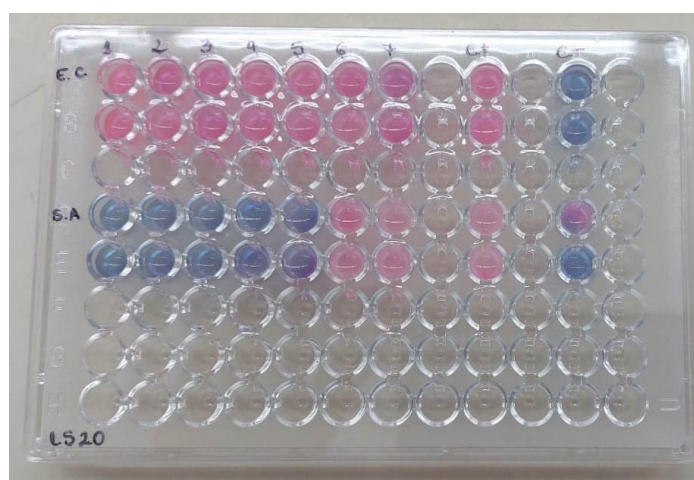

**Figure S10.** Colour change of the resazurin, with the lowest compound concentration remaining blue indicating the MIC 3.125  $\mu\text{g}/\text{mL}$  for I and 6.250  $\mu\text{g}/\text{mL}$  for II just for *S. aureus*.

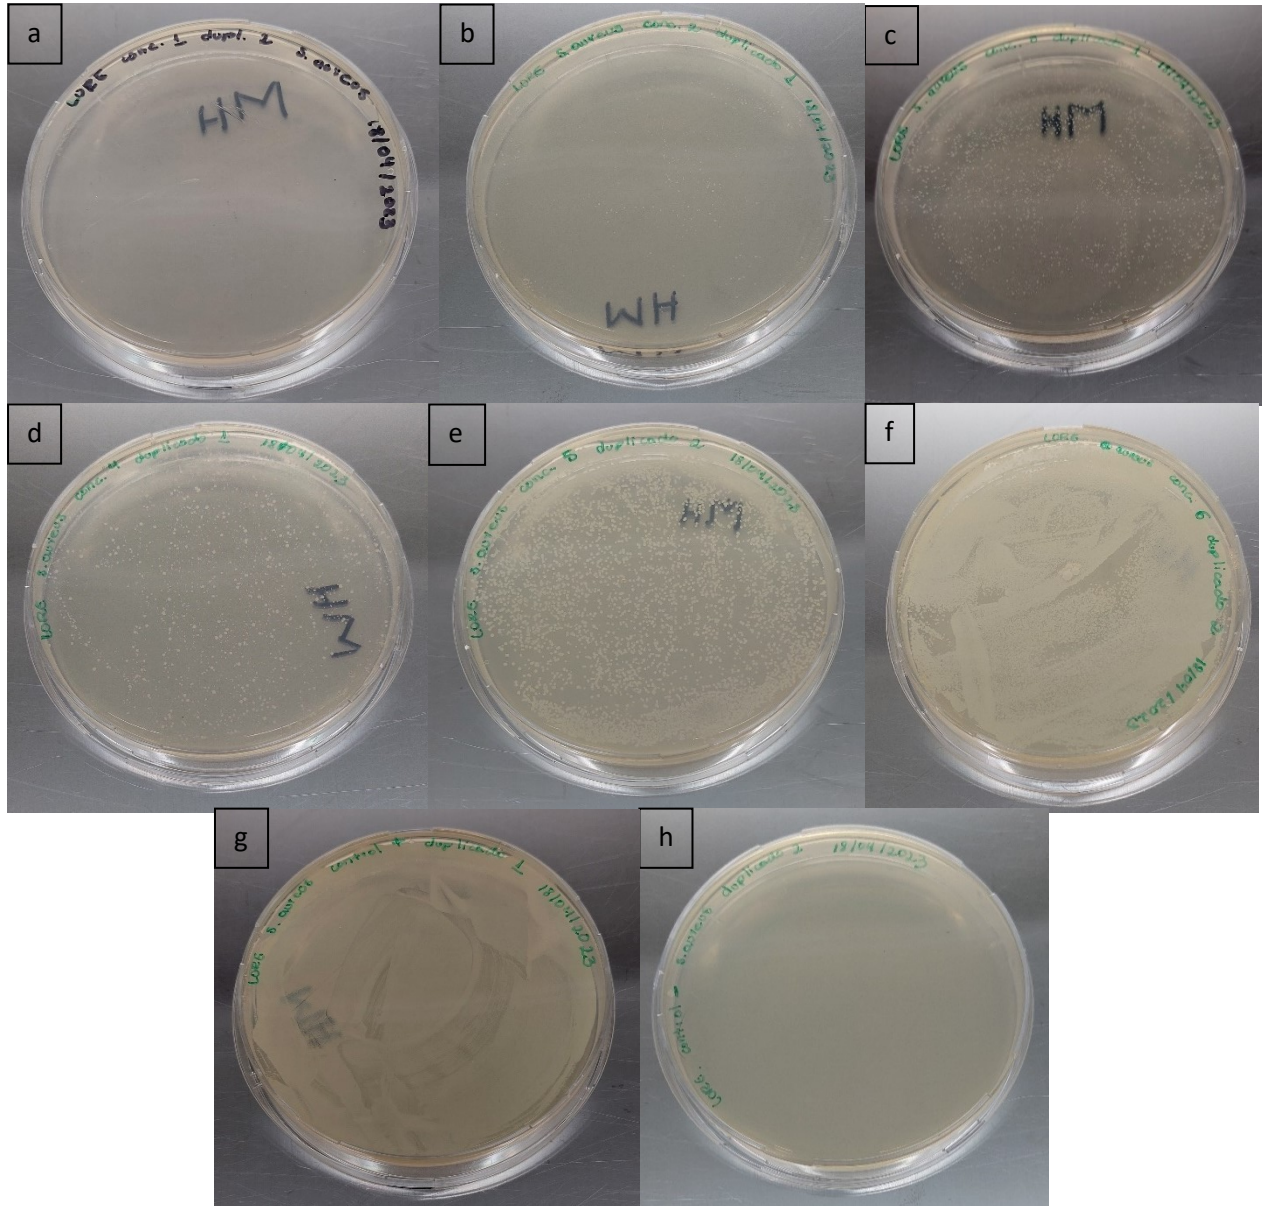

**Figure S11.** MBC test compound I for *S. aureus*. Concentration: a) 100 µg/mL; b) 50 µg/mL; c) 25 µg/mL; d) 12.5 µg/mL; e) 6.25 µg/mL; f) 3.125 µg/mL; g) Positive Control (*S. aureus*); h) Negative Control. MBC concentration 100 µg/mL.
